# Supplementary material
Source: PubMed Central journal article supplement (PMC5061131)
Supplement: NIHMS803851-supplement-Supplemental_Material.pdf [file NIHMS803851-supplement-Supplemental_Material.pdf]

# Essential Role of Smooth Muscle STIM1 in Hypertension and Cardiovascular Dysfunction

Modar Kassan<sup>1,2,4</sup>, Karima Ait-Aissa<sup>2</sup>, Eman Radwan<sup>2</sup>, Vishal Mali<sup>2</sup>, Samuel Haddox<sup>2</sup>, Mohanad Gabani<sup>4</sup>, Wei Zhang<sup>3</sup>, Souad Belmadani<sup>2</sup>, Kaikobad Irani<sup>4</sup>, Mohamed Trebak<sup>3\*</sup>, Khalid Matrougui<sup>1,2\*</sup>

**Short title:** STIM1 and cardiovascular dysfunction

<sup>1</sup>Department of Physiology, Hypertension and Renal Center of Excellence, Tulane University, New Orleans, LA 70112 (M.K and K.M); <sup>2</sup>Department of Physiological Sciences, EVMS, Norfolk, VA 23501 (M.K, K.M and K.A); <sup>3</sup>Penn State University College of Medicine, Department of Cellular and Molecular Physiology, Hershey, PA 17033 (M.T); <sup>4</sup>University of Iowa, Department of Internal Medicine, Iowa City, IA 52242.

\* Co-senior authors: correspondence should be addressed to either Khalid Matrougui, PhD., Department of Physiological Sciences, EVMS, Norfolk, VA 23501; phone: 757-446-5278; email: [matrouk@evms.edu](mailto:matrouk@evms.edu); or Mohamed Trebak, PhD., Penn State Hershey College of Medicine, Department of Cellular and Molecular Physiology, Hershey, PA 17033-0850, phone: 717-531-8152; email: [mtrebak@hmc.psu.edu](mailto:mtrebak@hmc.psu.edu)

**Subject Codes:** Basic / Vascular Biology / Cell Signaling/Signal Transduction

**Word account:** 6468

**Total number of figures and tables:** 5

**TOC category:** basic studies

**TOC subcategory:** Vascular Biology

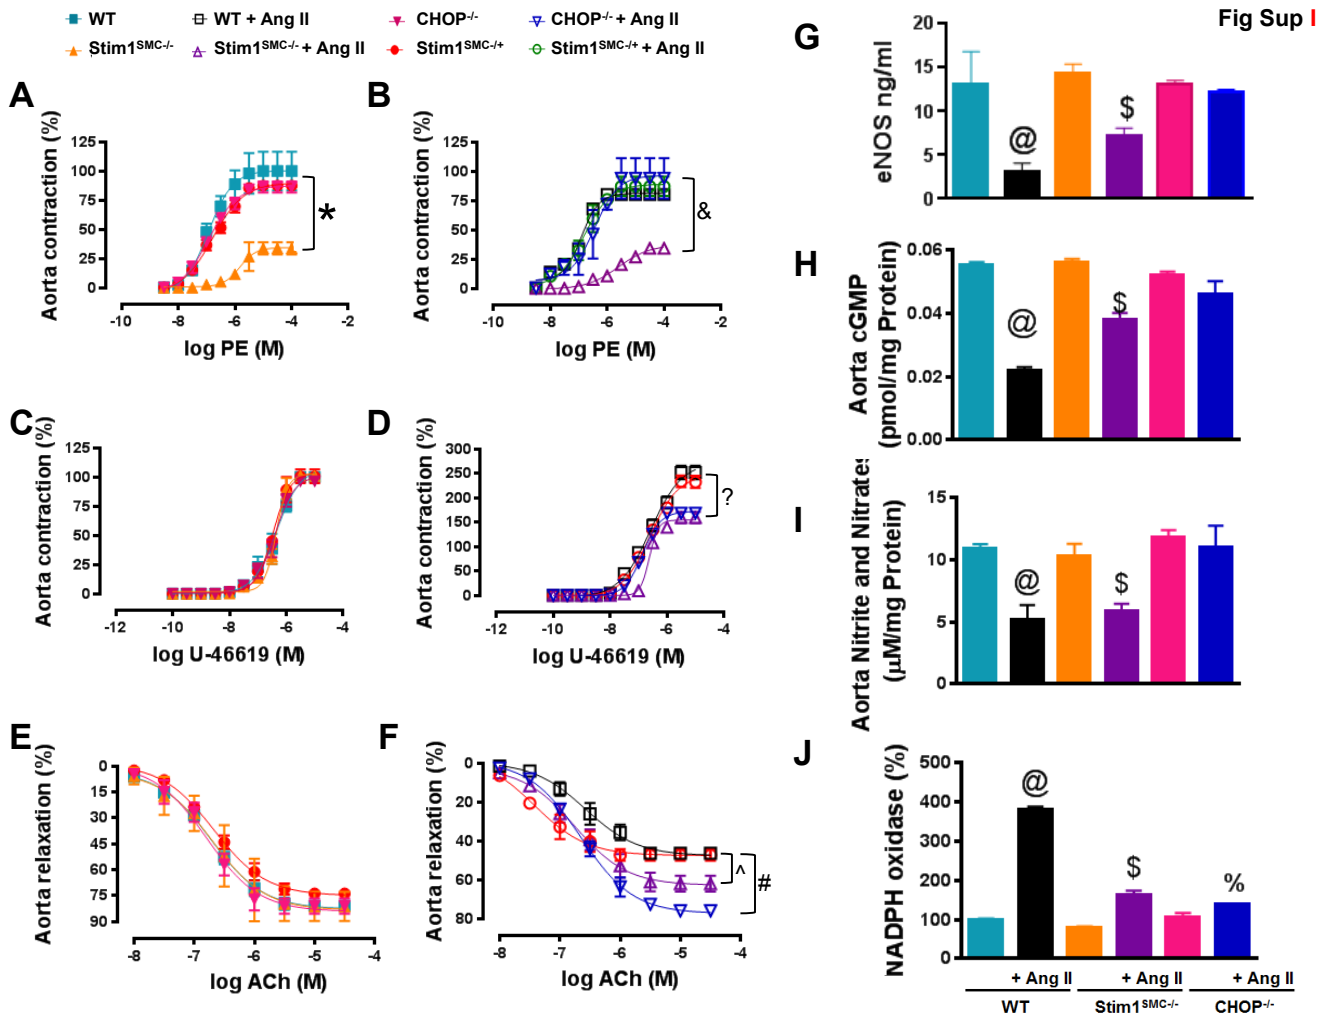

**Figure Supp I.- STIM1 and CHOP mediate hypertension-induced cardiac damage**

**and fibrosis.** Wire Myograph vascular reactivity showing Contraction response to phenylephrine (A, B, n=5-6) and thromboxaneA2 analogue U-46619 (C, D, n=5), and endothelial-dependent relaxation in response to acetylcholine (E, F, n=5) in thoracic aorta from in mesenteric resistance arteries from WT, heterozygous ( $Stim1^{SMC-/+}$ ) and homozygous  $Stim1$  knockout specifically in smooth muscle ( $Stim1^{SMC-/-}$ ), and CHOP knockout ( $CHOP^{-/-}$ ) mice infused with saline or Ang II. cGMP levels were determined using a sandwich enzyme-linked immunosorbent assay (G, n=3) Elisa showing eNOS levels (I, n=3), and nitrites/nitrate levels were determined using the Griess reaction (H, n=3), and NADPH oxidase using lucigenin chemiluminescence assays (J, n=5), in thoracic aortas from WT,  $Stim1^{SMC-/-}$  and  $CHOP^{-/-}$  mice infused with saline or Ang II.

Two-way repeated measured ANOVA followed by *Tukey's Post-Hoc test* was applied for figures (A, B, C, D, E, F). One-way ANOVA followed by *Bonferroni Post-Hoc test* was applied for figures (G, H, I, J).

\*  $p < 0.05$  between  $Stim1^{SMC-/-}$  vs WT,  $Stim1^{SMC-/+}$ , and  $CHOP^{-/-}$ . &  $p < 0.05$  between  $Stim1^{SMC-/-}$  + AngII vs WT + Ang II,  $Stim1^{SMC-/+}$  + Ang II,  $CHOP^{-/-}$  + Ang II. ?  $p < 0.05$  between  $Stim1^{SMC-/-}$  + AngII,  $CHOP^{-/-}$  + Ang II VS WT + Ang II,  $Stim1^{SMC-/+}$  + Ang II. ^  $p < 0.05$  between WT + Ang II,  $Stim1^{SMC-/+}$  + Ang II vs  $Stim1^{SMC-/-}$  + AngII. #  $p < 0.05$  between WT + Ang II,  $Stim1^{SMC-/+}$  + Ang II

| vs STIM<sup>SMC<sup>-/-</sup></sup> + AngII vs CHOP<sup>-/-</sup> + Ang II. <sup>@</sup>p<0.05 between WT + Ang II vs WT, STIM<sup>SMC<sup>-/-</sup></sup>, STIM<sup>SMC<sup>-/-</sup></sup> + AngII, CHOP<sup>-/-</sup>, CHOP<sup>-/-</sup> + Ang II. <sup>\$</sup>p<0.05 between STIM<sup>SMC<sup>-/-</sup></sup> vs STIM<sup>SMC<sup>-/-</sup></sup> + AngII. <sup>%</sup>p<0.05 between CHOP<sup>-/-</sup> vs CHOP<sup>-/-</sup> + Ang II.

Fig Sup II

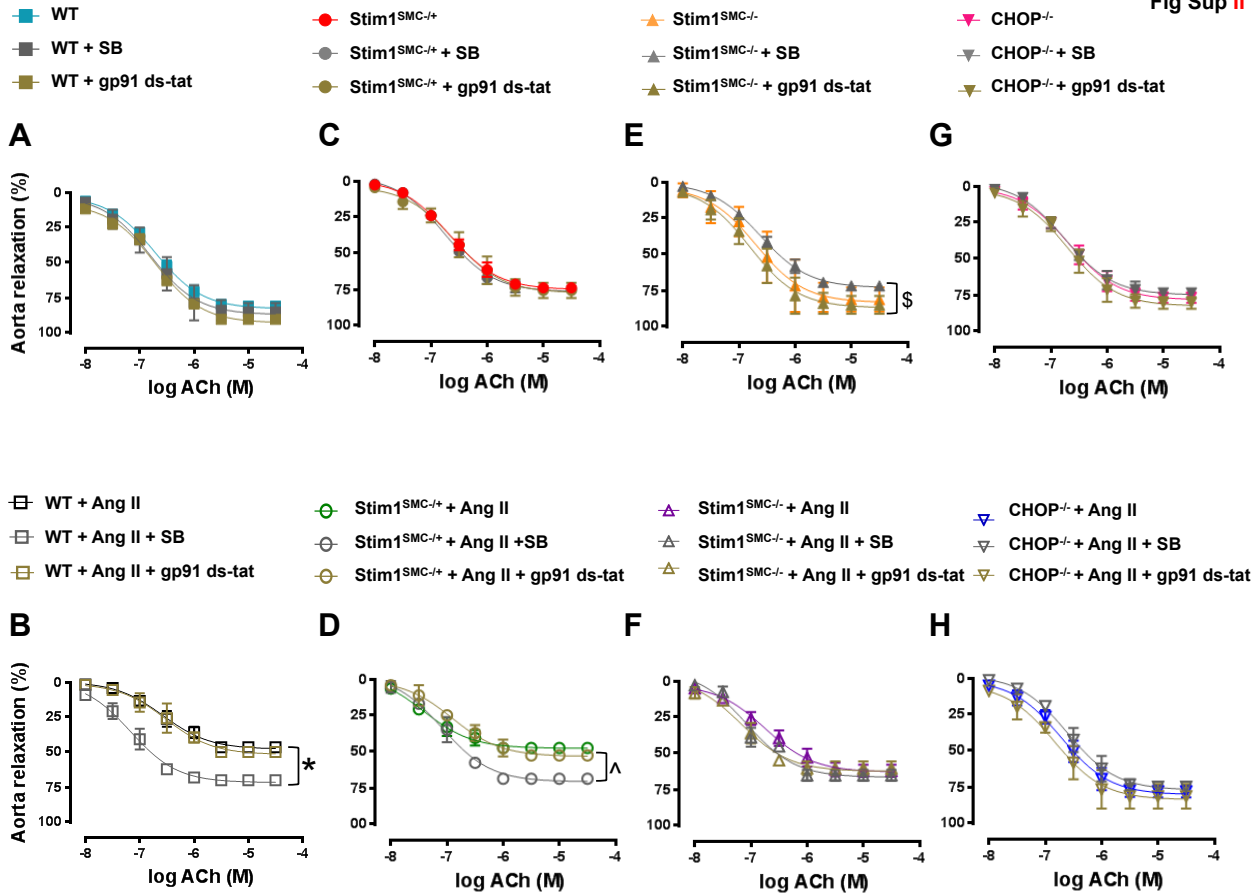

**Figure Supp. II.- STIM1 and CHOP regulate hypertension-induced vascular damage.** Wire Myograph vascular reactivity showing endothelial-dependent relaxation in response to acetylcholine before and after incubation with TGF- $\beta$  inhibitor (SB431542) and NADPH oxidase inhibitor (gp91 ds-tat) in thoracic aorta from:

- WT mice infused with saline or AngII (A, B, n=5)
- Heterozygous Stim1 knockout specifically in SMC (Stim1<sup>SMC+/+</sup>) mice infused with saline or AngII (C, D, n=5)
- Homozygous Stim1 knockout specifically in SMC (Stim1<sup>SMC-/-</sup>) mice infused with saline or AngII (E, F)
- CHOP knockout (CHOP<sup>-/-</sup>) mice infused with saline or AngII (G, H, n=5)

Two-way repeated measured ANOVA followed by Tukey's Post-Hoc test was applied for figures (A, B, C, D, E, F, G, H).

\* p<0.05 between WT + Ang II + gp91 ds-tat, WT + Ang II vs WT + Ang II + SB. ^ p<0.05 between Stim1<sup>SMC+/+</sup> + Ang II + gp91 ds-tat, Stim1<sup>SMC+/+</sup> + Ang II vs Stim1<sup>SMC+/+</sup> + Ang II + SB.

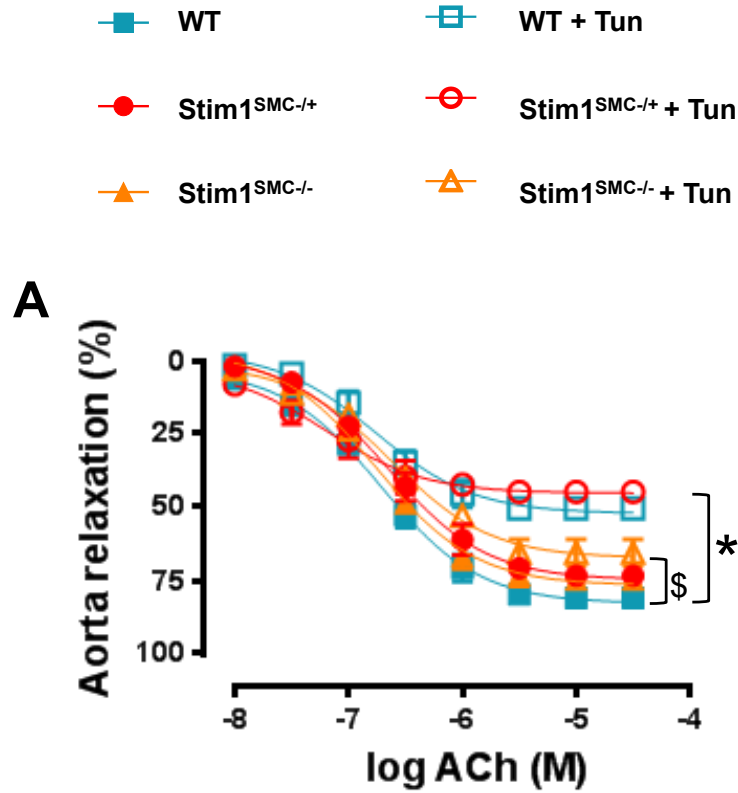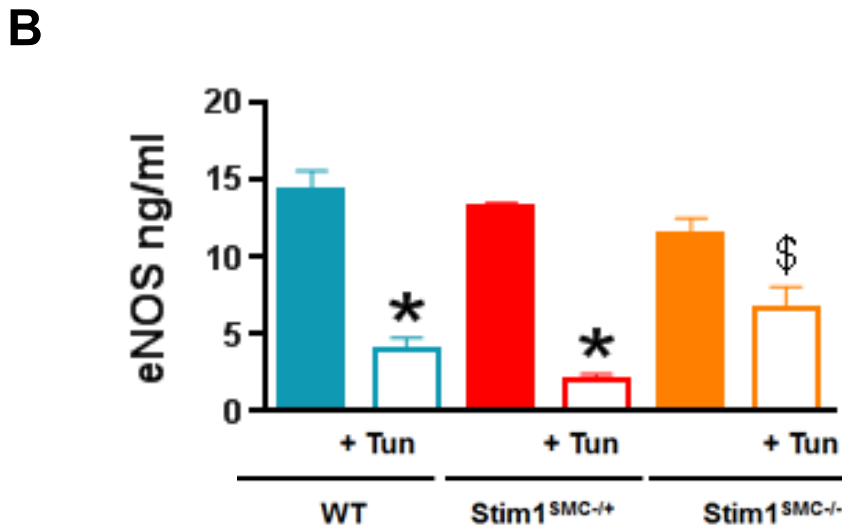

**Figure Supp. III.- Effect of Tunicamycin-induced ER stress on vascular reactivity in STIM1 knockout mice.** Wire Myograph vascular reactivity showing endothelial-dependent relaxation in response to acetylcholine (A, n=5) and eNOS levels (B, n=3) in thoracic aorta from WT, heterozygous (Stim1<sup>SMC-/+</sup>) and homozygous Stim1 knockout specifically in SMC (Stim1<sup>SMC-/-</sup>) mice treated with saline or Tunicamycin.

Two-way repeated measured ANOVA followed by *Tukey's Post-Hoc test* was applied for figure (A). One-way ANOVA followed by *Bonferroni Post-Hoc test* was applied for figure (B).

$p < 0.05$  between STIM<sup>SMC-/+</sup> + Tunica vs WT, STIM<sup>SMC-/-</sup>, STIM<sup>SMC-/+</sup>. \* $p < 0.05$  between STIM<sup>SMC-/+</sup> + Tunica, WT + Tunica vs STIM<sup>SMC-/+</sup> + Tunica, WT, STIM<sup>SMC-/-</sup>, STIM<sup>SMC-/+</sup>.  
 $p < 0.05$  between STIM<sup>SMC-/-</sup> + Tunica vs STIM<sup>SMC-/+</sup> + Tunica and WT + Tunica.

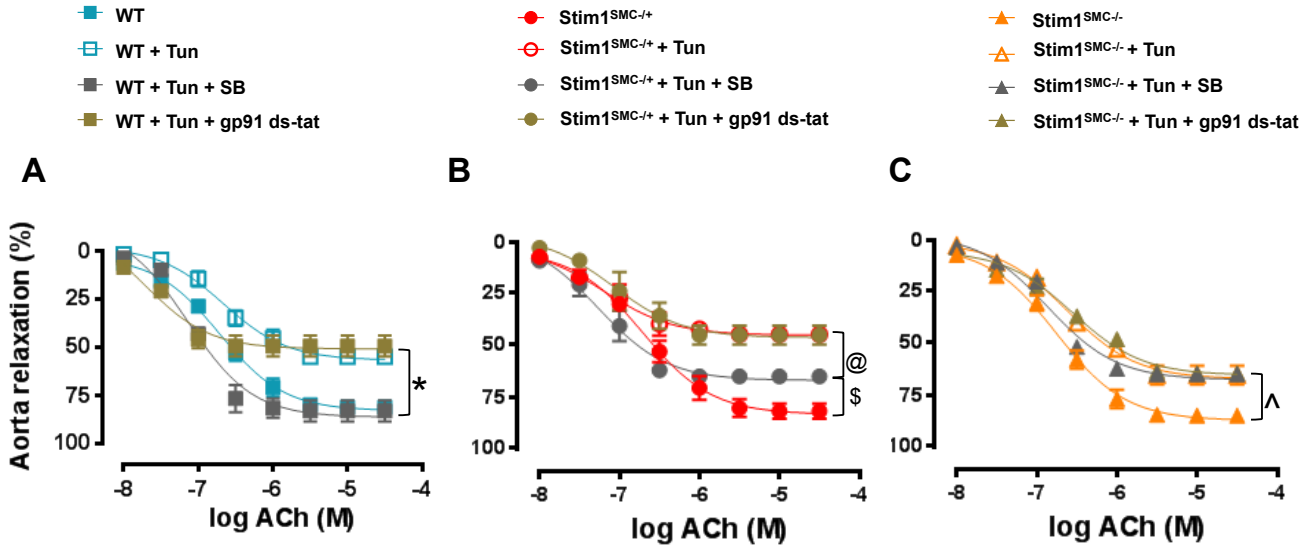

**Figure Supp. IV.- Effect of inhibition of NADPH oxidase and TGF- $\beta$  signaling on Vascular reactivity in tunicamycin-treated STIM1 knockout mice.** Wire Myograph vascular reactivity showing endothelial-dependent relaxation in response to acetylcholine before and after incubation with TGF- $\beta$  inhibitor (SB431542) and NADPH oxidase inhibitor (gp91 ds-tat) in thoracic aorta from:

- WT mice treated with saline or Tunicamycin (A, n=5)
- Heterozygous Stim1 knockout specifically in SMC (Stim1<sup>SMC-/+</sup>) mice treated with saline or Tunicamycin (B, n=5)
- Homozygous Stim1 knockout specifically in SMC (Stim1<sup>SMC-/-</sup>) mice treated with saline or Tunicamycin (C, n=5)

Two-way repeated measured ANOVA followed by Tukey's Post-Hoc test was applied for figures (A, B, C)

\* p<0.05 between WT + Tunica, WT + Tunica + gp91 ds-tat vs WT + Tunica + SB.  
 § p<0.05 between STIM<sup>SMC-/+</sup> vs STIM<sup>SMC-/+</sup> + Tunica + SB. @ p<0.05 between STIM<sup>SMC-/+</sup> + Tunica + SB vs STIM<sup>SMC-/+</sup> + Tunica, STIM<sup>SMC-/+</sup> + Tunica + gp91 ds-tat. ^ p<0.05 between STIM<sup>SMC-/-</sup> vs STIM<sup>SMC-/-</sup> + Tunica, STIM<sup>SMC-/-</sup> + Tunica + gp91 ds-tat, STIM<sup>SMC-/-</sup> + Tunica + SB.

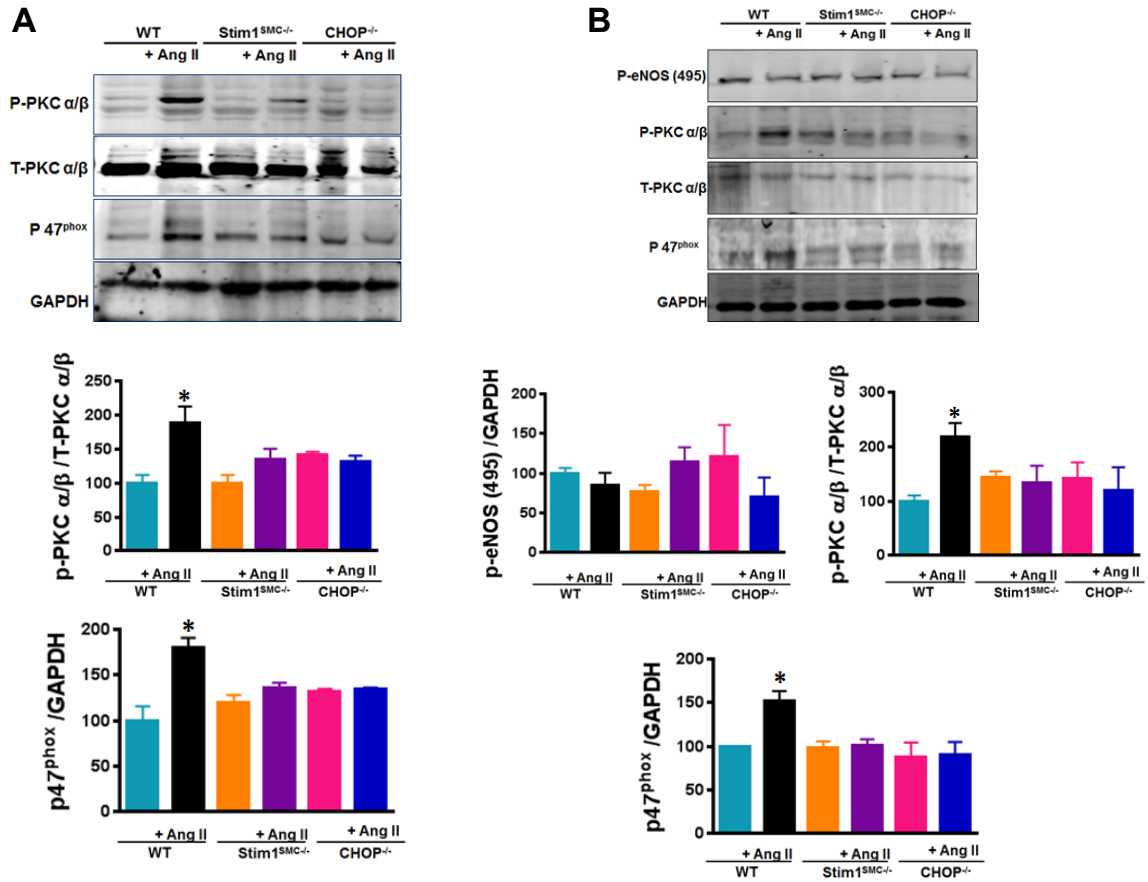

**Figure Supp. V.- Effect of STIM1 and CHOP deletion on hypertension-induced uncoupling eNOS and NADPH oxidase.** Western blot analysis and quantification for uncoupled eNOS markers (eNOS T495, P and T-PKCα/β) and NADPH oxidase subunit p47 phox in mesenteric arteries (MRA, **A**, n=4) and thoracic aorta (**B**, n=4) from:

- WT mice infused with saline or Angiotensin II
- CHOP knockout mice infused with saline or Angiotensin II.
- Homozygous Stim1 knockout specifically in SMC (Stim1<sup>SMC-/-</sup>) mice infused with saline or Angiotensin II.

One-way ANOVA followed by *Bonferroni Post-Hoc test* was applied for figures (A, B).

\* p<0.05 between WT + Ang II vs WT, CHOP<sup>-/-</sup>, CHOP<sup>-/-</sup> + Ang II, STIM<sup>SMC-/-</sup> and STIM<sup>SMC-/-</sup> + Ang II.

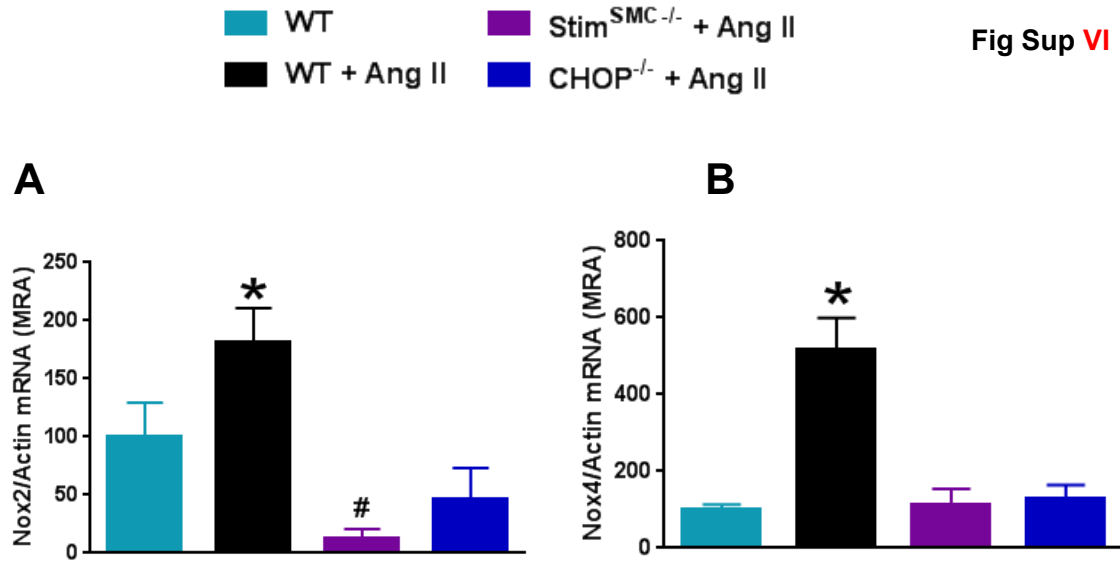

**Figure Supp. VI.- Effect of STIM1 and CHOP deletion on NADPH oxidase subunits during hypertension.** Real Time PCR showing the mRNA expression of Nox1 (A, n=3-4), Nox2 (B, n=3-4) and Nox4 (C, n=3-4) in mesenteric arteries (MRA) from:  
- WT mice infused with saline or Angiotensin II  
- CHOP knockout mice infused with Angiotensin II.  
- Homozygous Stim1 knockout specifically in SMC (Stim1<sup>SMC-/-</sup>) mice infused with Angiotensin II.  
One-way ANOVA followed by *Bonferroni Post-Hoc test* was applied for figures (A, B).

\*p<0.05 between WT + Ang II vs WT, CHOP<sup>-/-</sup> + Ang II and STIM<sup>SMC-/-</sup> + Ang II. #p<0.05 between STIM<sup>SMC-/-</sup> + Ang II vs WT and CHOP<sup>-/-</sup> + Ang II.



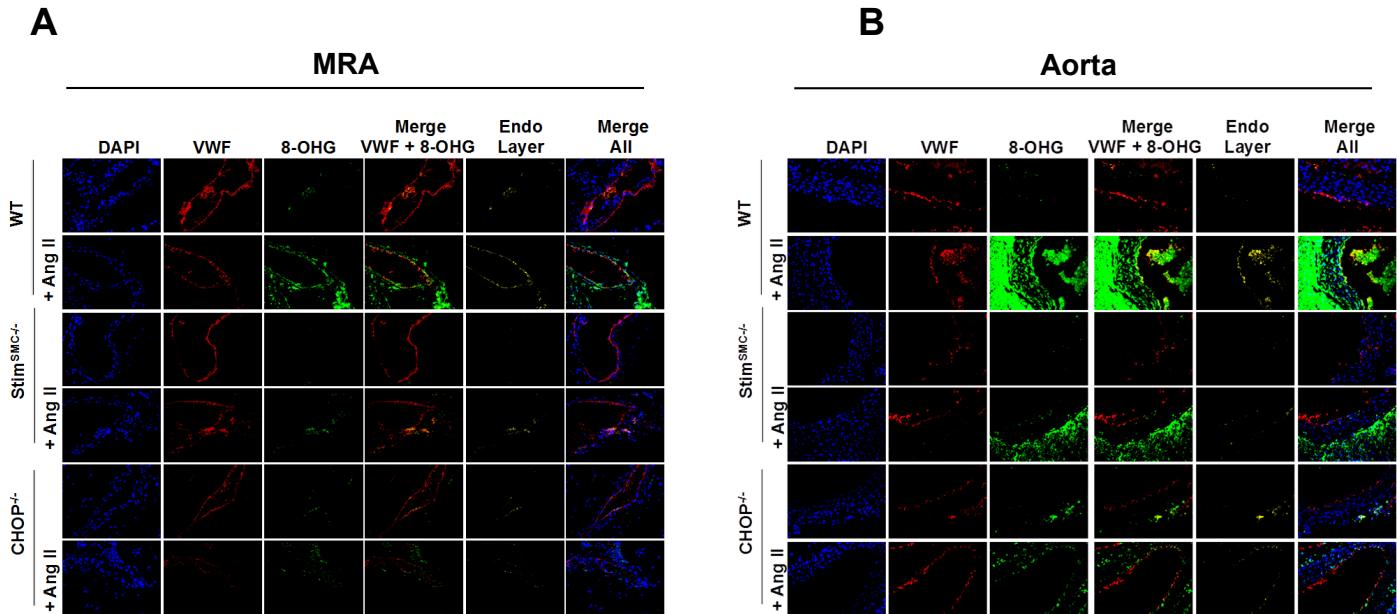

**Figure Supp. VII.- Effect of STIM1 and CHOP deletion on oxidative stress.**

Immunostaining showing the expression of 8-hydroxy-2-deoxyguanosine (8-OHD) in mesenteric arteries (MRA, **A**, **n=3**) and thoracic aorta (**B**, **n=3**) from:

- WT mice infused with saline or Angiotensin II
- CHOP knockout mice infused with saline or Angiotensin II.
- Homozygous Stim1 knockout specifically in SMC (Stim1<sup>SMC-/-</sup>) mice infused with saline or Angiotensin II.

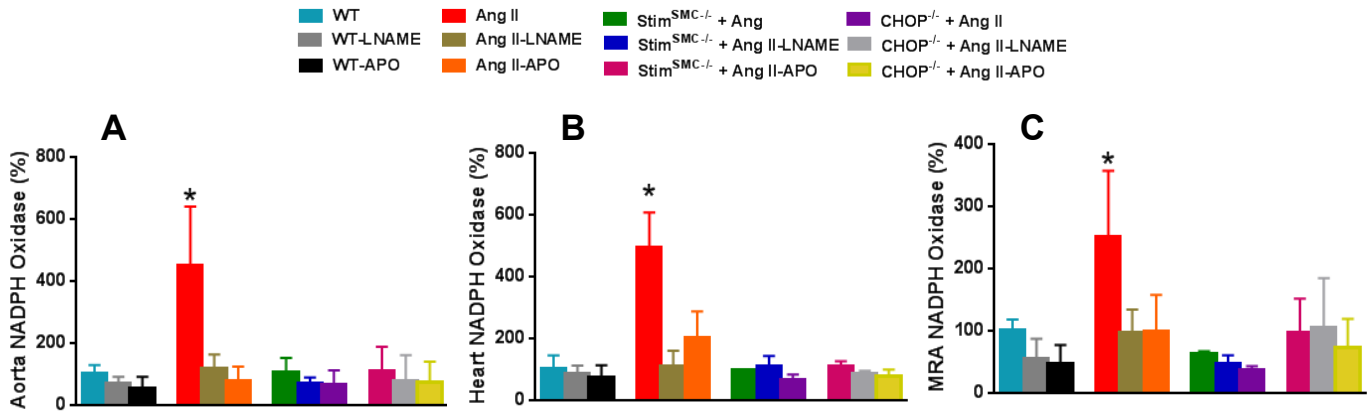

**Figure Supp. VIII.- Effect of STIM1 and CHOP deletion on NADPH oxidase activity during hypertension.** Luminometer showing the NADPH oxidase activity in the presence and absence of L-NAME and Apocynin in mesenteric arteries (MRA, **A**, n=4), heart (**B**, n=4) and thoracic aorta (**C**, n=4) from:

- WT mice infused with saline or Angiotensin II
- CHOP knockout mice infused with Angiotensin II.
- Homozygous Stim1 knockout specifically in SMC ( $Stim1^{SMC^{-/-}}$ ) mice infused with Angiotensin II.

One-way ANOVA followed by *Bonferroni Post-Hoc test* was applied for figures (A, B, C)

\*  $p < 0.05$  between WT + Ang II vs WT ± L-NAME or Apocynin, WT + Ang II ± L-NAME or Apocynin,  $Stim1^{SMC^{-/-}}$  + Ang II ± L-NAME or Apocynin and  $CHOP^{-/-}$  + Ang II ± L-NAME or Apocynin.

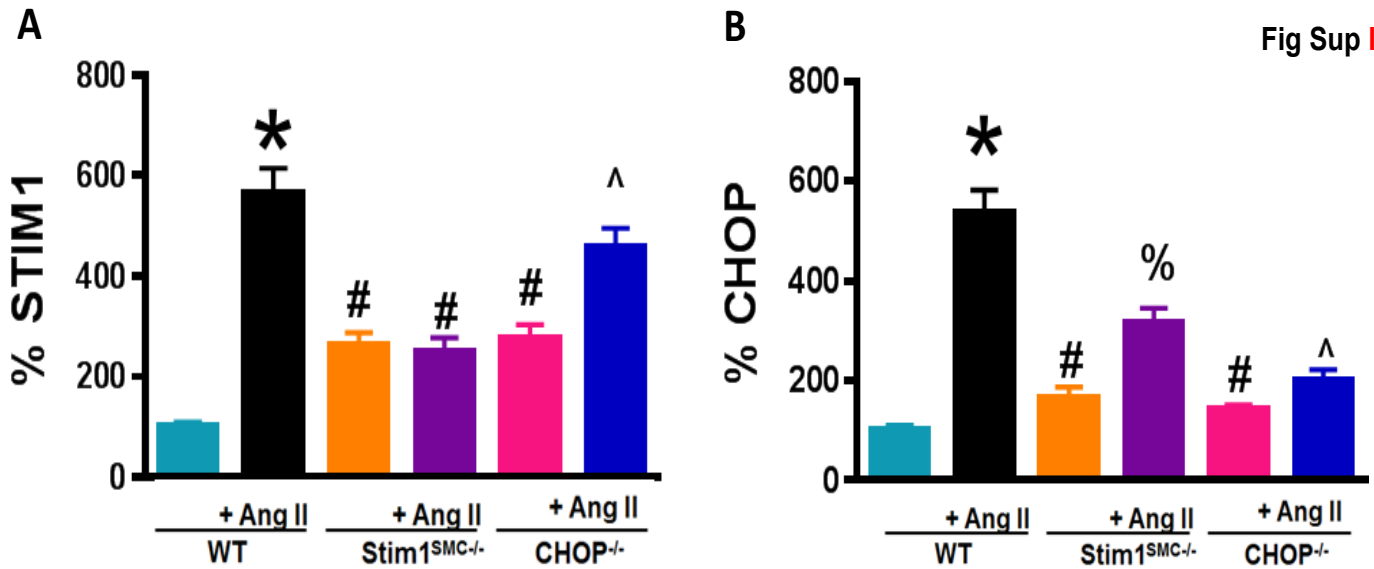

**Figure Supp. IX.- Effect of Angiotensin II on STIM1 and CHOP in heart.** Quantification of STIM1 (A) and CHOP (B) in heart (n=4) from:

- WT mice infused with saline or Angiotensin II
- CHOP knockout mice infused with Angiotensin II.
- Homozygous Stim1 knockout specifically in SMC (Stim1<sup>SMC-/-</sup>) mice infused with Angiotensin II.

One-way ANOVA followed by *Bonferroni Post-Hoc test* was applied for figures (A, B).

\*p<0.05 between WT+ Ang II vs WT, Stim1<sup>SMC-/-</sup>, Stim1<sup>SMC-/-</sup> + Ang II, CHOP<sup>-/-</sup> and CHOP<sup>-/-</sup> + Ang II.

#p<0.05 between WT vs Stim1<sup>SMC-/-</sup>, Stim1<sup>SMC-/-</sup> + Ang II, CHOP<sup>-/-</sup>.

^p<0.05 between CHOP<sup>-/-</sup> + Ang II vs WT, Stim1<sup>SMC-/-</sup>, Stim1<sup>SMC-/-</sup> + Ang II, CHOP<sup>-/-</sup>.

%p<0.05 between Stim1<sup>SMC-/-</sup> + Ang II vs WT, Stim1<sup>SMC-/-</sup>, CHOP<sup>-/-</sup> and CHOP<sup>-/-</sup> + Ang II.

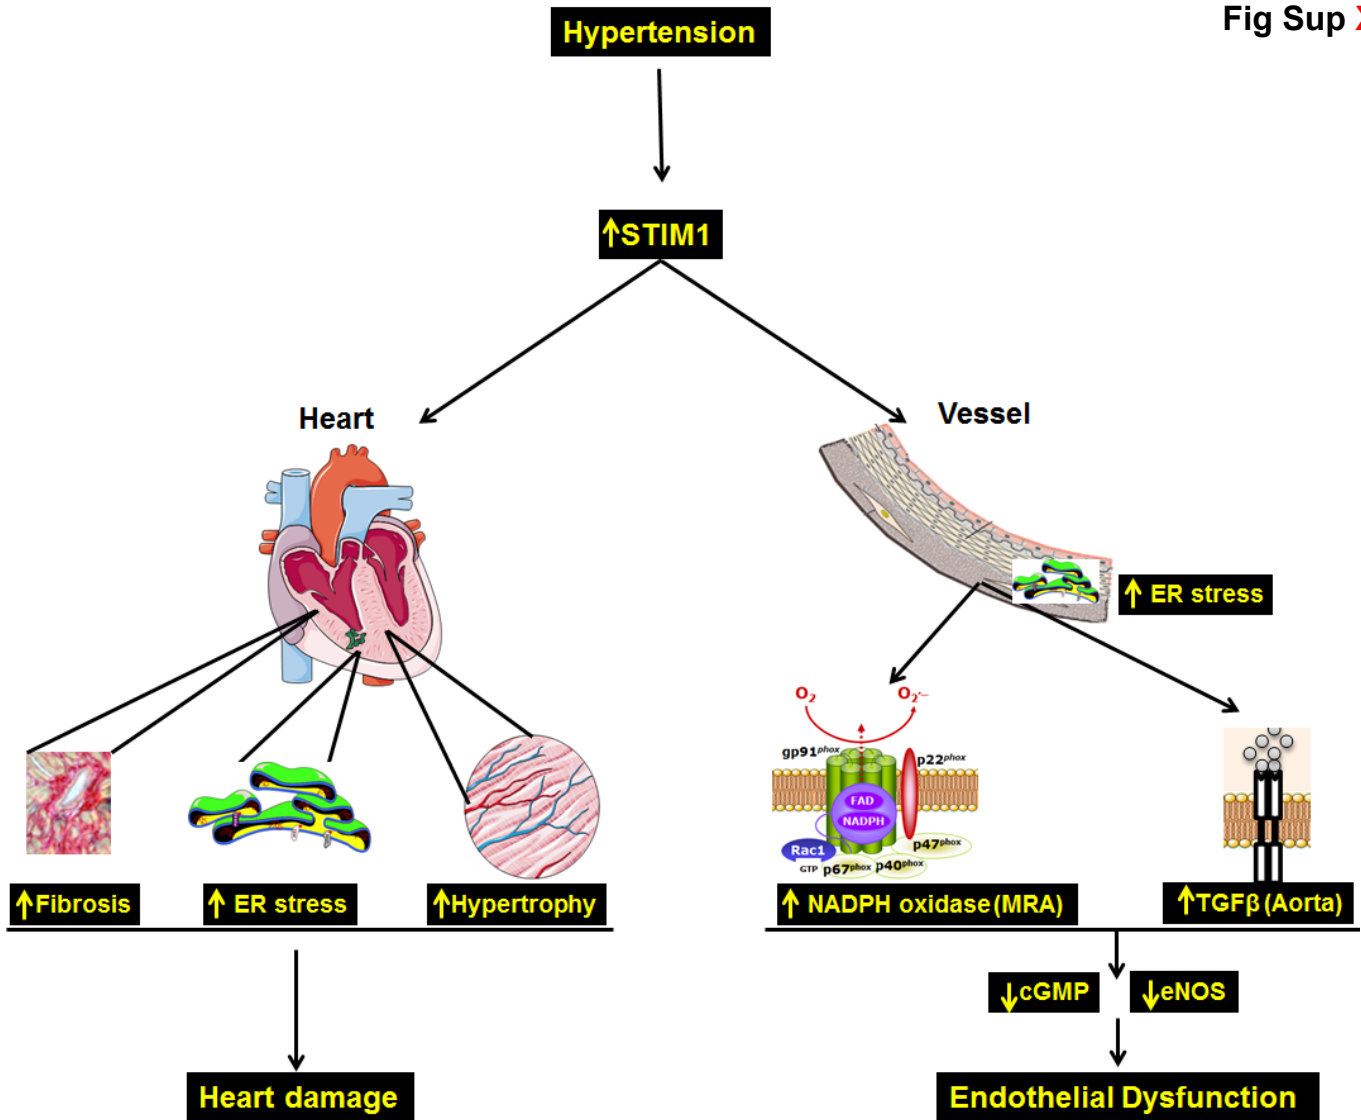

Figure Supp. 9.- schematic summarizing the main findings.
