# Supplementary material
Source: PubMed Central journal article supplement (PMC5061131)

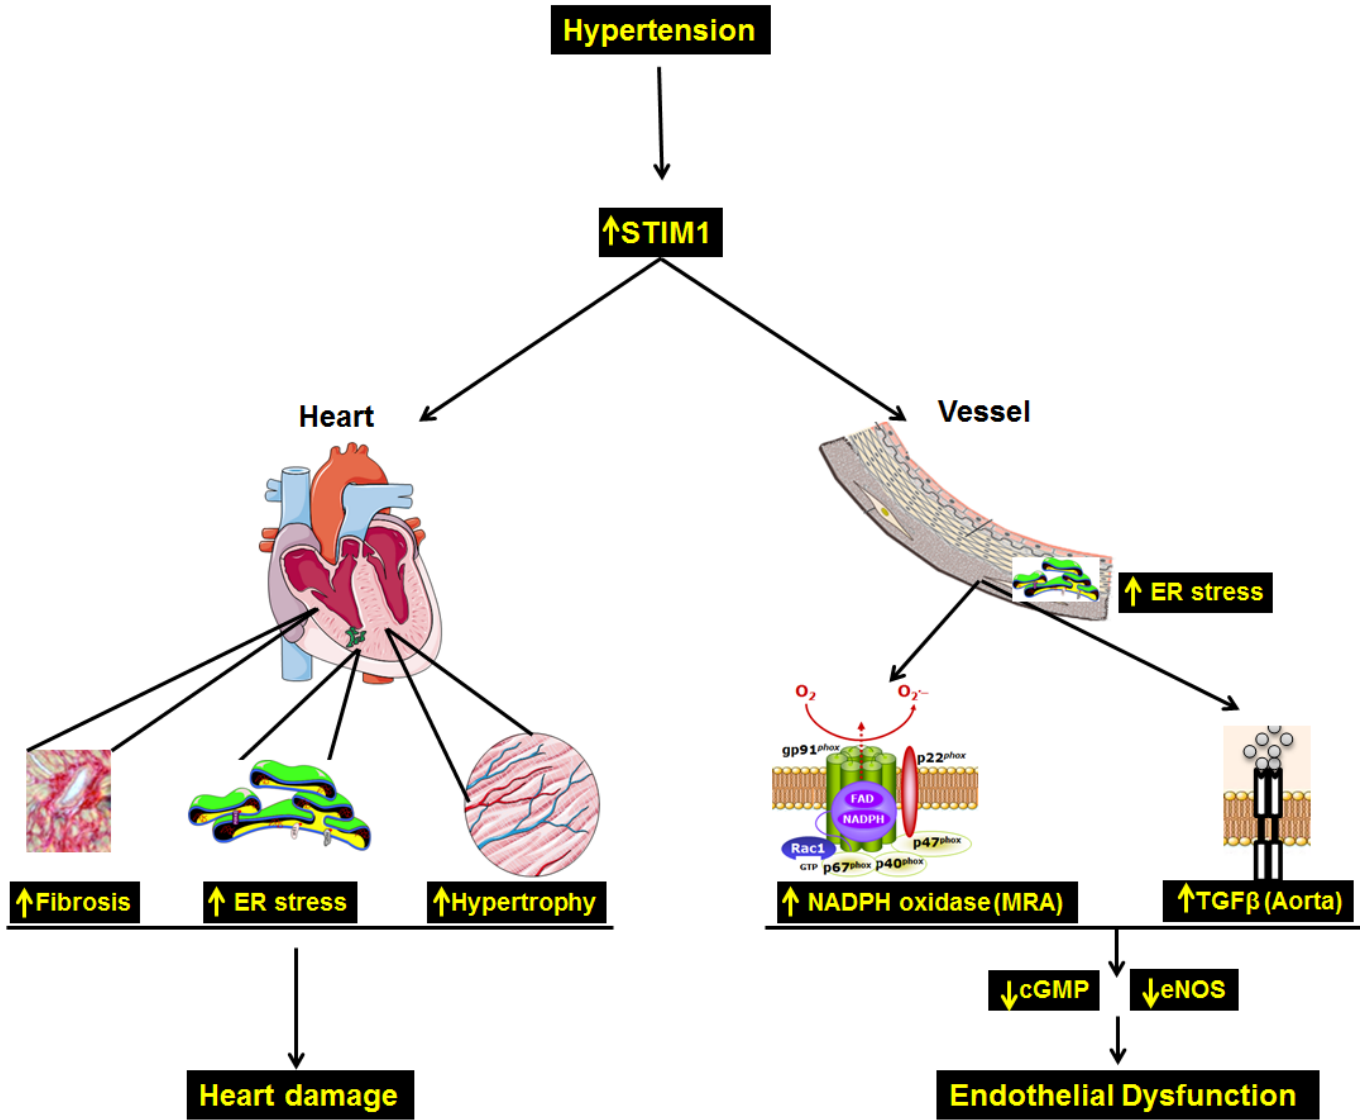

Graphic abstract

Supplement: NIHMS803851-supplement-Graphic_Abstract.pdf [file NIHMS803851-supplement-Graphic_Abstract.pdf]
